# Supplementary material for: Design, Synthesis, and Biological Evaluation of Pyridazinones Containing the (2-Fluorophenyl) Piperazine Moiety as Selective MAO-B Inhibitors
Source: PubMed Central journal article supplement (PMC7698448; doi:10.3390/molecules25225371), 2020-11-17

# Supplementary Materials

## Design, Synthesis, and Biological Evaluation of Pyridazinones Containing the (2-Fluorophenyl) Piperazine Moiety as selective MAO-B Inhibitors

Muhammed Çeçen <sup>1,†</sup>, Jong Min Oh <sup>2,†</sup>, Zeynep Özdemir <sup>1,\*</sup>, Saliha Ebru Büyüktuncel <sup>3</sup>, Mehtap Uysal <sup>4</sup>, Mohamed A. Abdelgawad <sup>5,6</sup>, Arafa Musa <sup>7,8</sup>, Nicola Gambacorta <sup>9</sup>, Orazio Nicolotti <sup>9</sup>, Bijo Mathew <sup>10,\*</sup> and Hoon Kim <sup>2,\*</sup>

<sup>1</sup> Department of Pharmaceutical Chemistry, Faculty of Pharmacy, Inonu University, Malatya 44280, Turkey; mcecen2344@gmail.com

<sup>2</sup> Department of Pharmacy, and Research Institute of Life Pharmaceutical Sciences, Suncheon National University, Suncheon 57922, Korea; ddazzo005@naver.com

<sup>3</sup> Department of Analytical Chemistry, Faculty of Pharmacy, Inonu University, Malatya 44280, Turkey; saliha.buyuktuncel@inonu.edu.tr

<sup>4</sup> Department of Pharmaceutical Chemistry, Faculty of Pharmacy, Gazi University, Ankara 06100, Turkey; mgokce99@gmail.com

<sup>5</sup> Department of Pharmaceutical Chemistry, College of Pharmacy, Jouf University, Sakaka, Al Jouf 72341, Saudi Arabia; mohamedabdelwahab976@yahoo.com

<sup>6</sup> Department of Pharmaceutical Organic Chemistry, Faculty of Pharmacy, Beni-Suef University, Beni Suef 62514, Egypt

<sup>7</sup> Department of Pharmacognosy, College of Pharmacy, Jouf University 72341, Sakaka, Saudi Arabia; akmusa@ju.edu.sa

<sup>8</sup> Department of Pharmacognosy, Faculty of Pharmacy, Al-Azhar University, Cairo 11371, Egypt

<sup>9</sup> Dipartimento di Farmacia-Scienze del Farmaco, Università degli Studi di Bari "Aldo Moro", Via E. Orabona, 4, I-70125 Bari, Italy; nicola.gambacorta1@uniba.it (N.G.); orazio.nicolotti@uniba.it (O.N.)

<sup>10</sup> Department of Pharmaceutical Chemistry, Amrita School of Pharmacy, Amrita Vishwa Vidyapeetham, Amrita Health Science Campus, Kochi-682 041, India

\* Correspondence: zeynep.bulut@inonu.edu.tr (Z.Ö.); bijovilaventgu@gmail.com (B.M.); hoon@suncheon.ac.kr or hoon@scnu.ac.kr (H.K.)

† These authors contributed equally to this work.

### Data 1. <sup>1</sup>H-NMR spectrum of compound T1

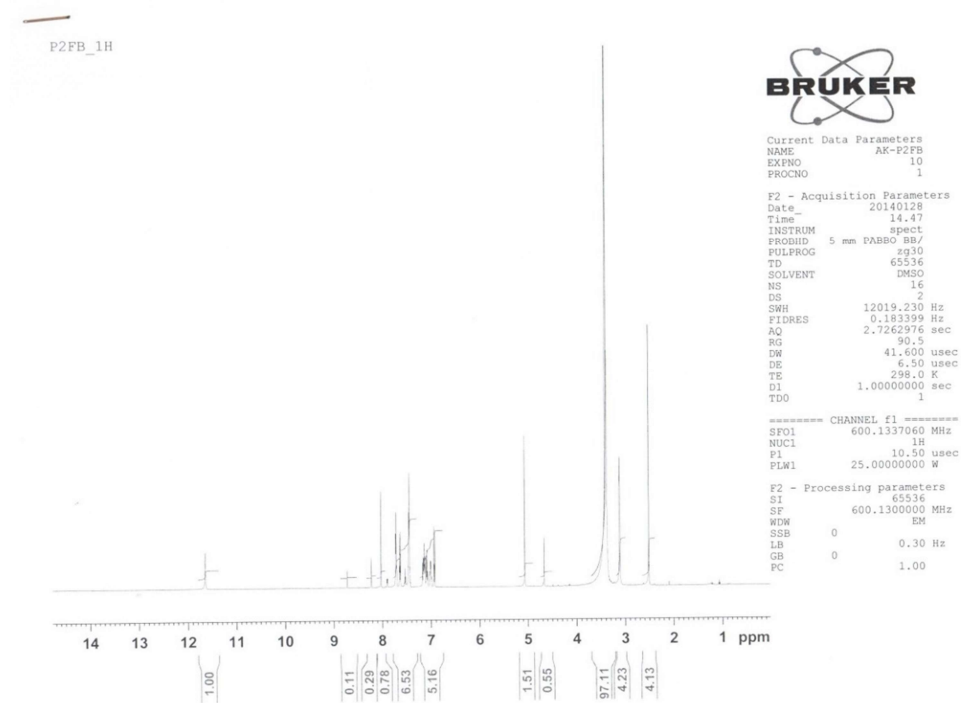

### Data 2. <sup>13</sup>C-NMR spectrum of compound T1

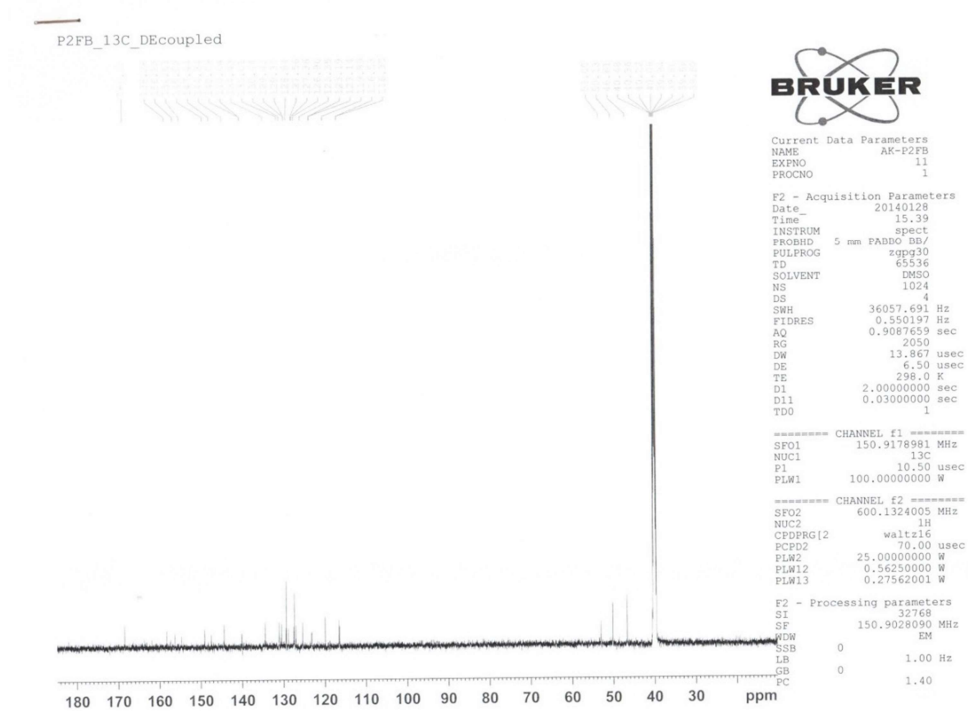

### Data 3. HRMS spectrum of compound T1

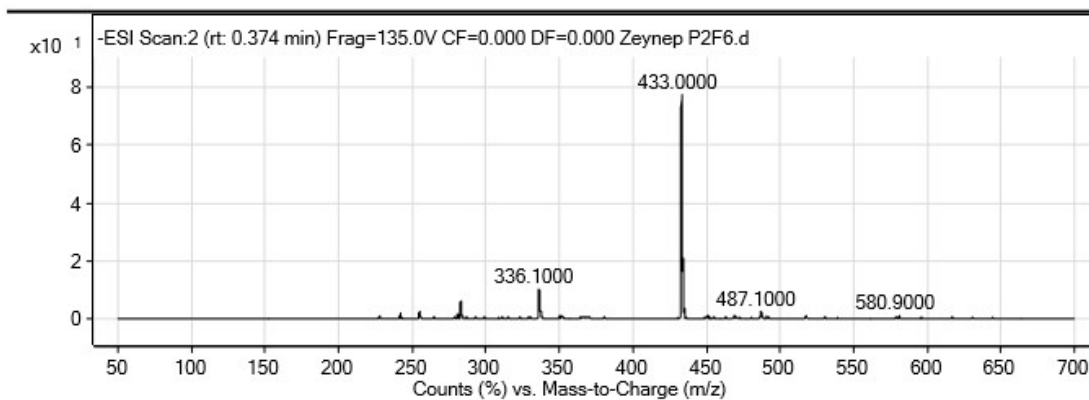

#### Peak List

| m/z   | z | Abund    |
|-------|---|----------|
| 241.9 |   | 2196.5   |
| 255.1 | 1 | 3057.06  |
| 280.8 |   | 1658.48  |
| 283.1 |   | 7019.18  |
| 336.1 | 1 | 11244.46 |
| 337.1 | 1 | 3218.38  |
| 433   | 1 | 85811.05 |
| 434   | 1 | 22975.82 |
| 435   | 1 | 3972.78  |

### Data 4. <sup>1</sup>H-NMR spectrum of compound T2

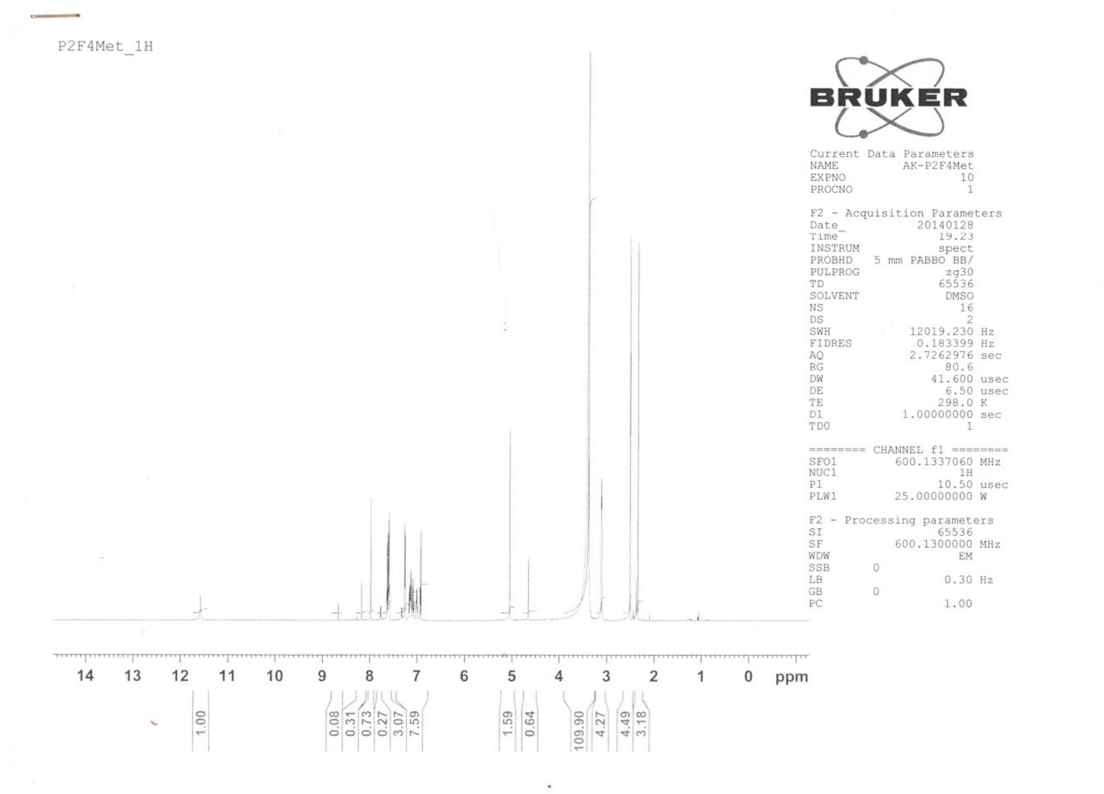

### Data 5. <sup>13</sup>C-NMR spectrum of compound T2

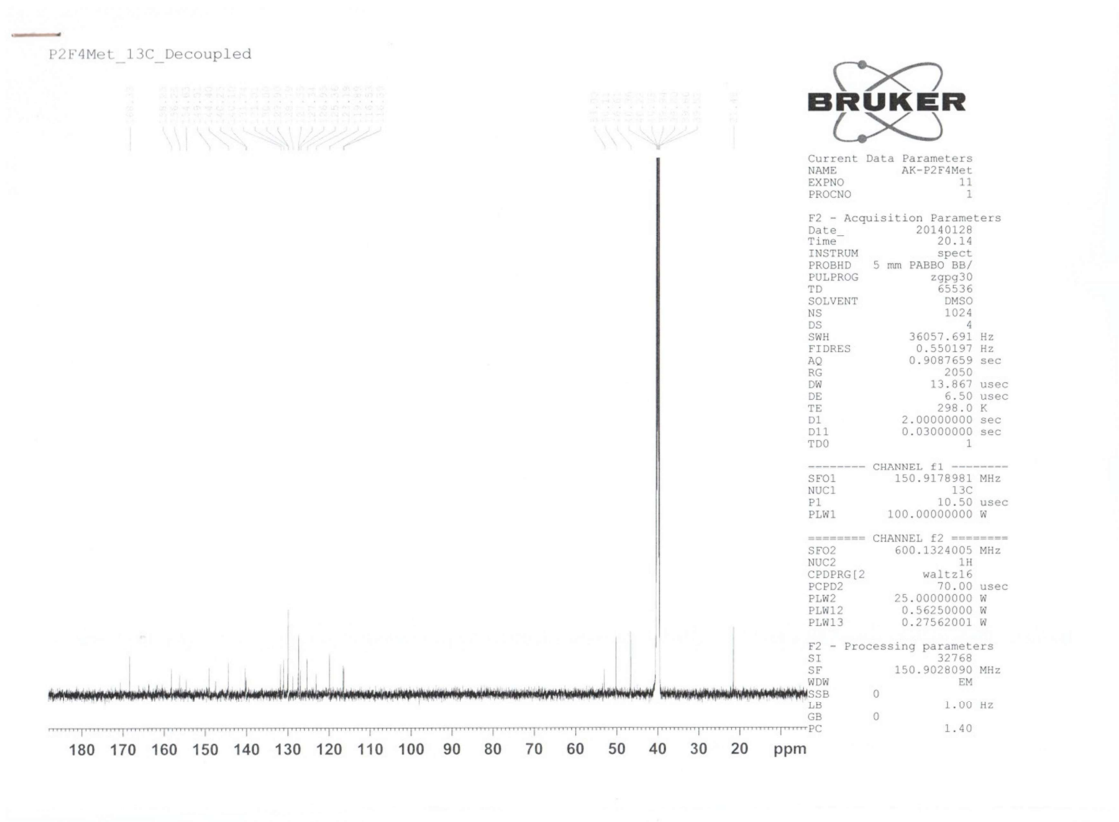

**Data 6. HRMS spectrum of compound T2**

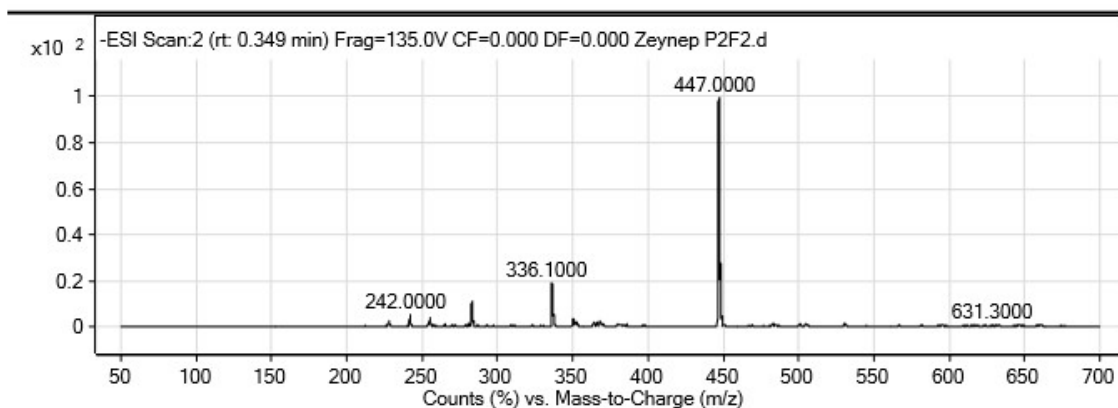

**Peak List**

| m/z   | z | Abund    |
|-------|---|----------|
| 228.1 |   | 2618.28  |
| 242   |   | 5255.52  |
| 255.1 |   | 3681.6   |
| 283   |   | 10534.4  |
| 336.1 |   | 18198.36 |
| 337.2 | 1 | 4868.92  |
| 350.1 |   | 3531.82  |
| 447   | 1 | 93741.25 |
| 448   | 1 | 25748.56 |
| 449   | 1 | 4422.98  |

**Data 7. <sup>1</sup>H-NMR spectrum of compound T3**

P2F2C1\_1H

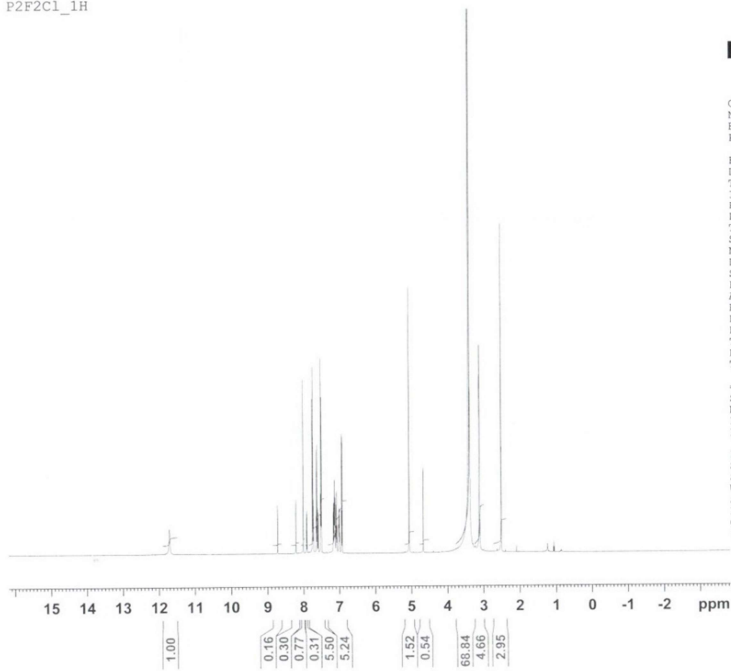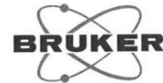

Current Data Parameters  
NAME AK-P2F2C1  
EXPNO 10  
PROCNO 1

F2 - Acquisition Parameters  
Date\_ 20140128  
Time 15.43  
INSTRUM spect  
PROBHD 5 mm PABBO BB/  
PULPROG zg30  
TD 65536  
SOLVENT DMSO  
NS 16  
DS 2  
SWH 12019.230 Hz  
FIDRES 0.183399 Hz  
AQ 2.7262976 sec  
RG 80.6  
DW 41.600 usec  
DE 6.50 usec  
TE 298.0 K  
D1 1.00000000 sec  
TDO 1

===== CHANNEL f1 =====  
SFO1 600.1337060 MHz  
NUC1 1H  
P1 10.50 usec  
PLW1 25.00000000 W

F2 - Processing parameters  
SI 65536  
SF 600.1300000 MHz  
WDW EM  
SSB 0  
LB 0.30 Hz  
GB 0  
PC 1.00

### Data 8. <sup>13</sup>C-NMR spectrum of compound T3

P2F2C1\_13C\_Decoupled

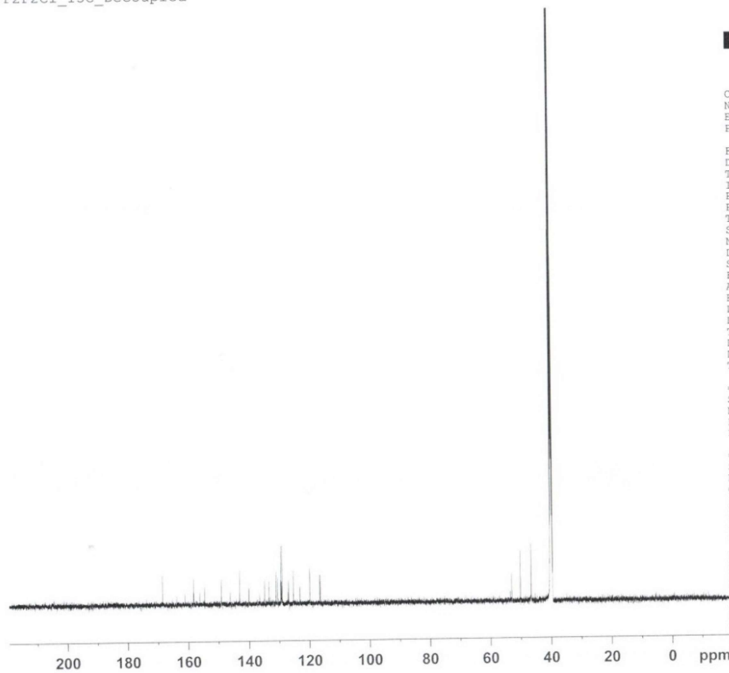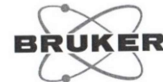

Current Data Parameters  
NAME AK-P2F2C1  
EXPNO 11  
PROCNO 1

F2 - Acquisition Parameters  
Date\_ 20140128  
Time 16.34  
INSTRUM spect  
PROBHD 5 mm PABBO BB/  
PULPROG zgpg30  
TD 65536  
SOLVENT DMSO  
NS 1024  
DS 4  
SWH 36057.691 Hz  
FIDRES 0.550197 Hz  
AQ 0.9087659 sec  
RG 2050  
DW 13.867 usec  
DE 6.50 usec  
TE 298.0 K  
D1 2.00000000 sec  
D11 0.03000000 sec  
TDO 1

===== CHANNEL f1 =====  
SFO1 150.9178981 MHz  
NUC1 13C  
P1 10.50 usec  
PLW1 100.00000000 W

===== CHANNEL f2 =====  
SFO2 600.1324005 MHz  
NUC2 1H  
CPDPRG2 waltz16  
PCPD2 70.00 usec  
PLW2 25.00000000 W  
PLW12 0.56250000 W  
PLW13 0.27562001 W

F2 - Processing parameters  
SI 32768  
SF 150.9028090 MHz  
WDW EM  
SSB 0  
LB 1.00 Hz  
GB 0  
PC 1.40

### Data 9. HRMS spectrum of compound T3

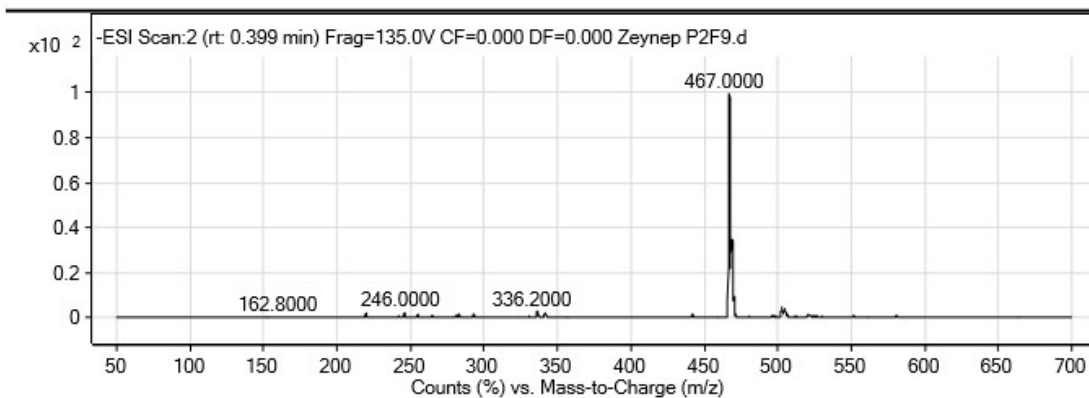

**Peak List**

| m/z   | z | Abund     |
|-------|---|-----------|
| 220   | 1 | 2460.52   |
| 246   |   | 2666.44   |
| 336.2 |   | 3515.12   |
| 341.6 | 2 | 2662.1    |
| 467   |   | 118998.15 |
| 468.3 |   | 40049.68  |
| 469   | 1 | 41925.7   |
| 470   | 1 | 11476.82  |

**Data 10. <sup>1</sup>H-NMR spectrum of compound T4**

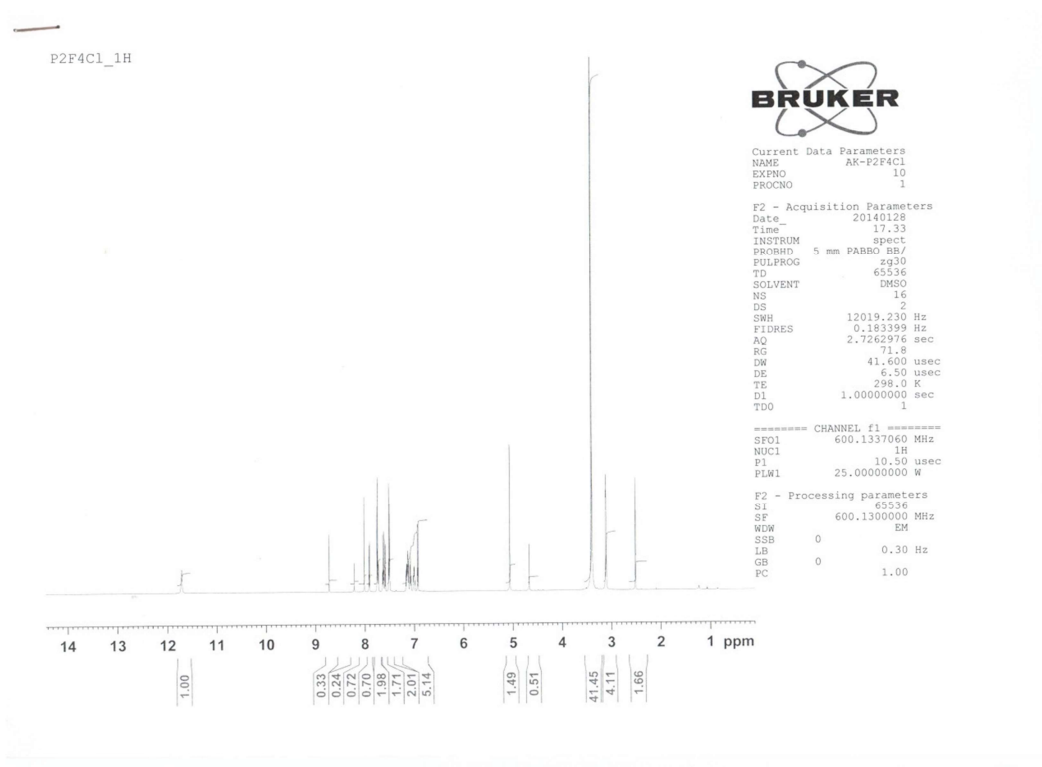

**Data 11. <sup>13</sup>C-NMR spectrum of compound T4**

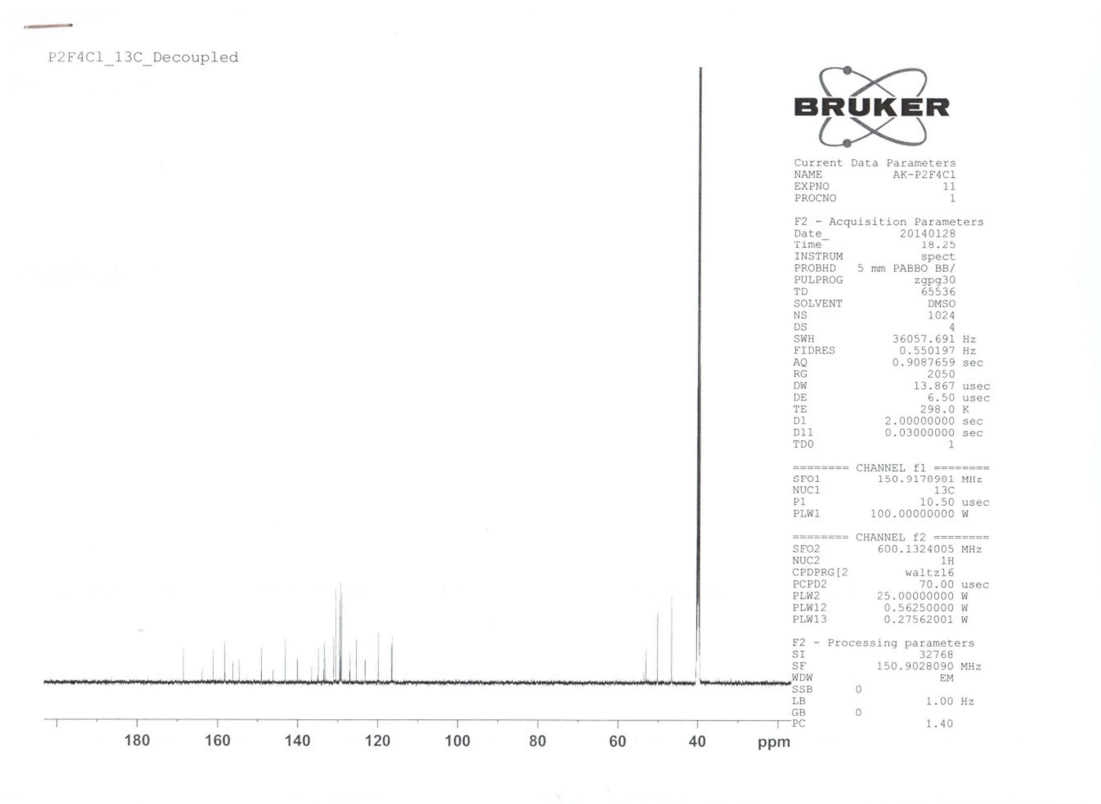

**Data 12. HRMS spectrum of compound T4**

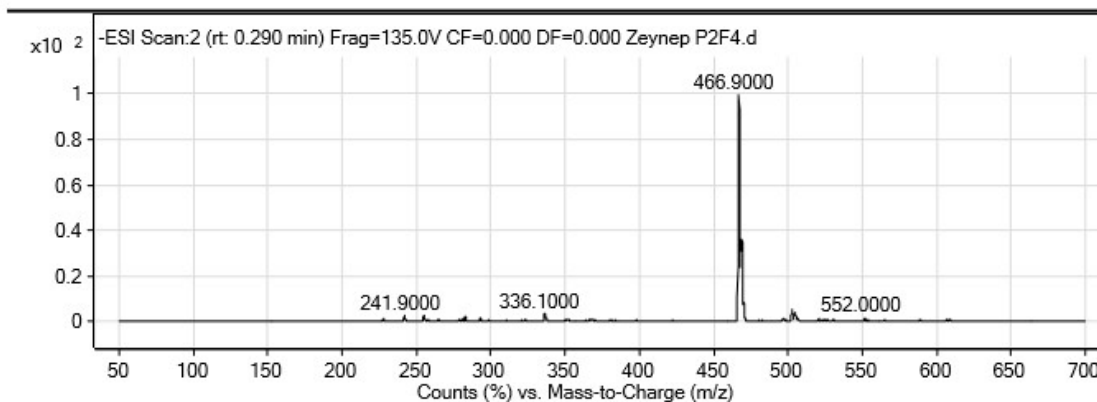

**Peak List**

| m/z   | z | Abund     |
|-------|---|-----------|
| 241.9 |   | 3589.42   |
| 254.7 | 2 | 2865.68   |
| 255.1 |   | 3232.08   |
| 336.1 | 1 | 4549.26   |
| 466.9 |   | 121424.79 |
| 468.2 |   | 43604.76  |
| 468.9 | 1 | 43965.76  |
| 469.9 | 1 | 10811.56  |

**Data 13. <sup>1</sup>H-NMR spectrum of compound T5**

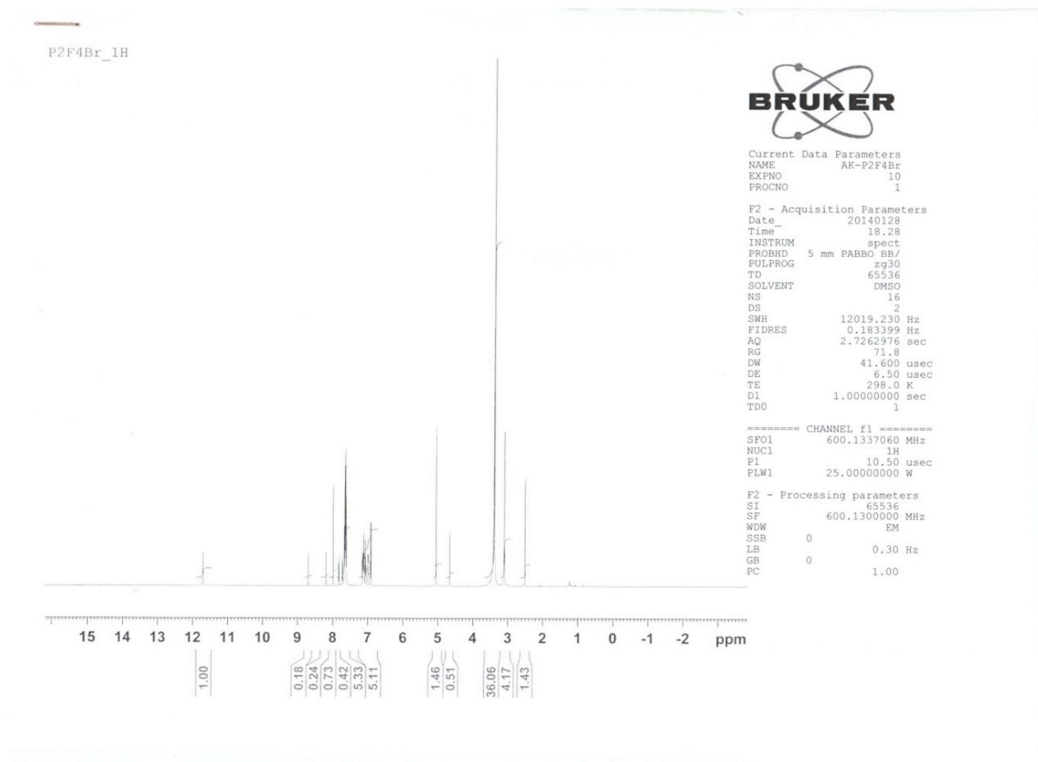

Data 14. <sup>13</sup>C-NMR spectrum of compound T5

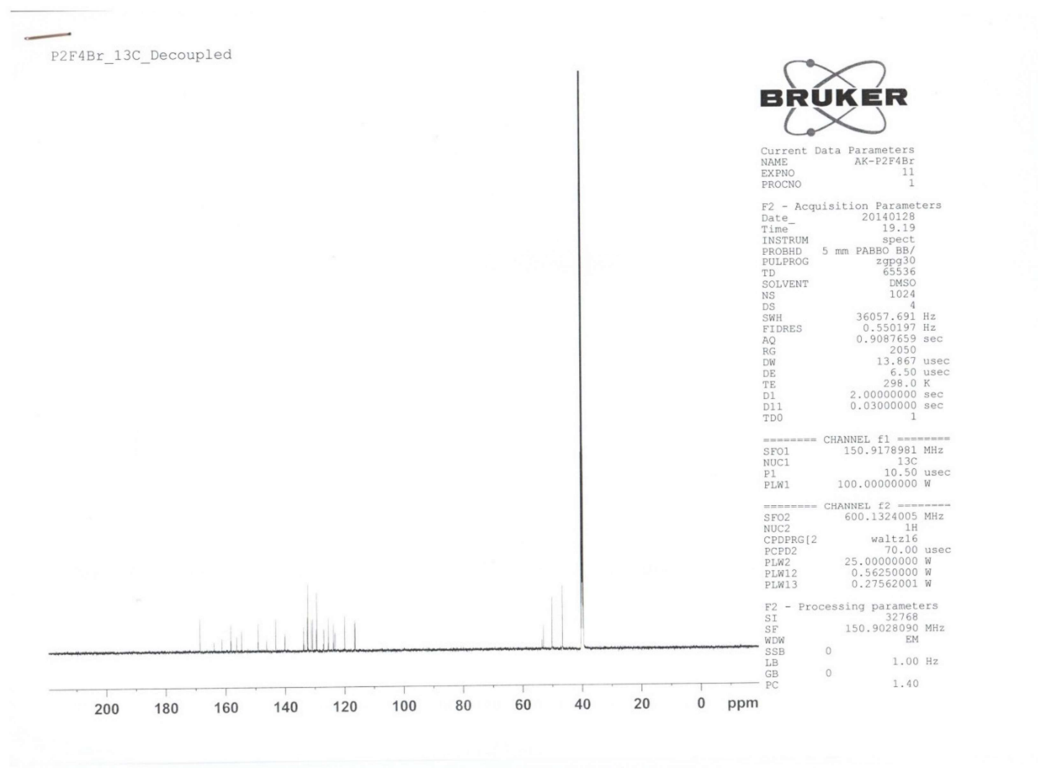

Data 15. HRMS spectrum of compound T5



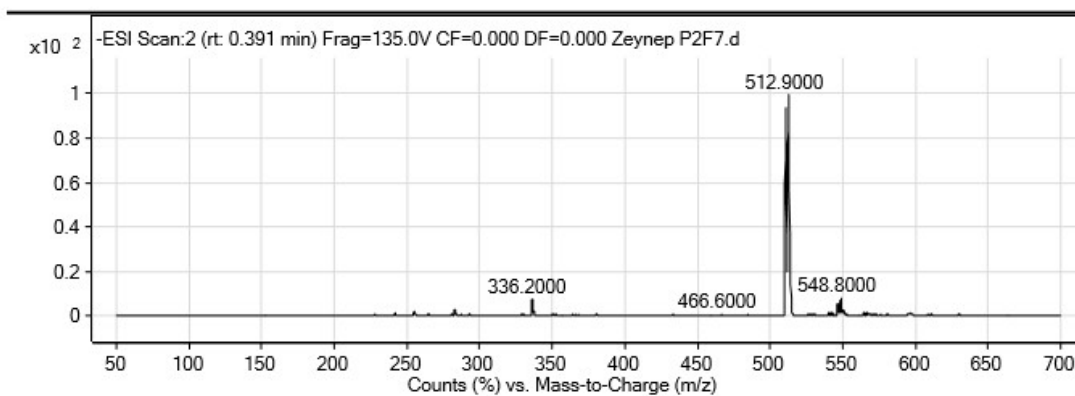

**Peak List**

| m/z   | z | Abund    |
|-------|---|----------|
| 283.1 |   | 2781.52  |
| 336.2 | 1 | 7290.16  |
| 510.9 |   | 93370.91 |
| 512.9 | 1 | 99546.02 |
| 513.9 | 1 | 25357.88 |
| 514.9 | 1 | 4260.32  |

**Data 16. <sup>1</sup>H-NMR spectrum of compound T6**

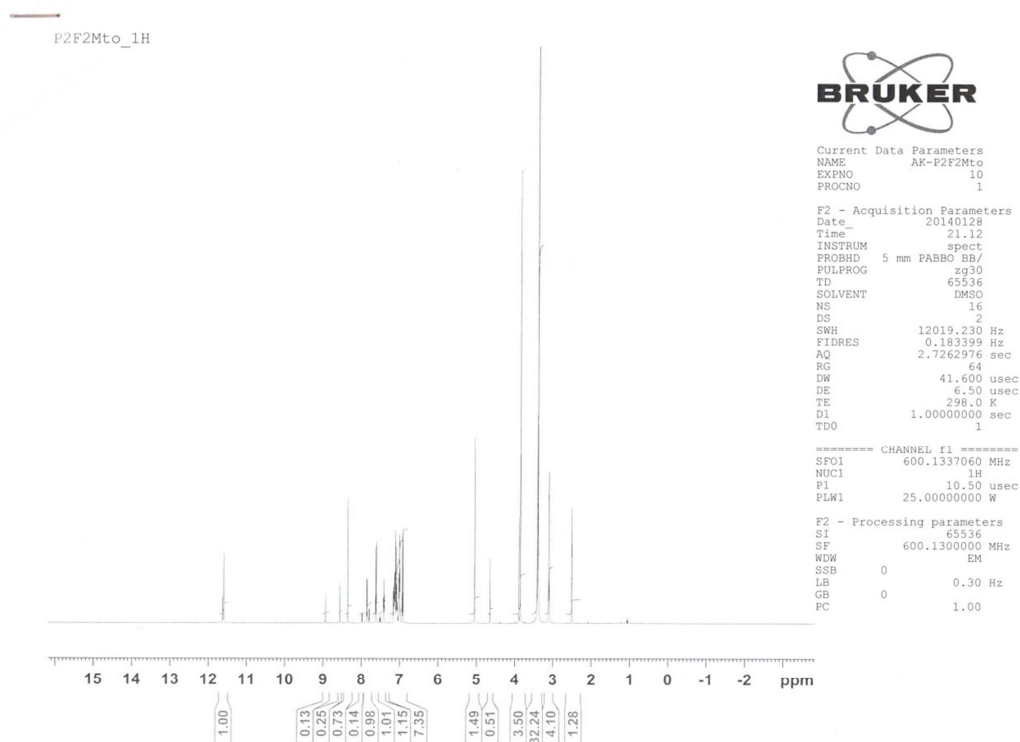

**Data 17. <sup>13</sup>C-NMR spectrum of compound T6**

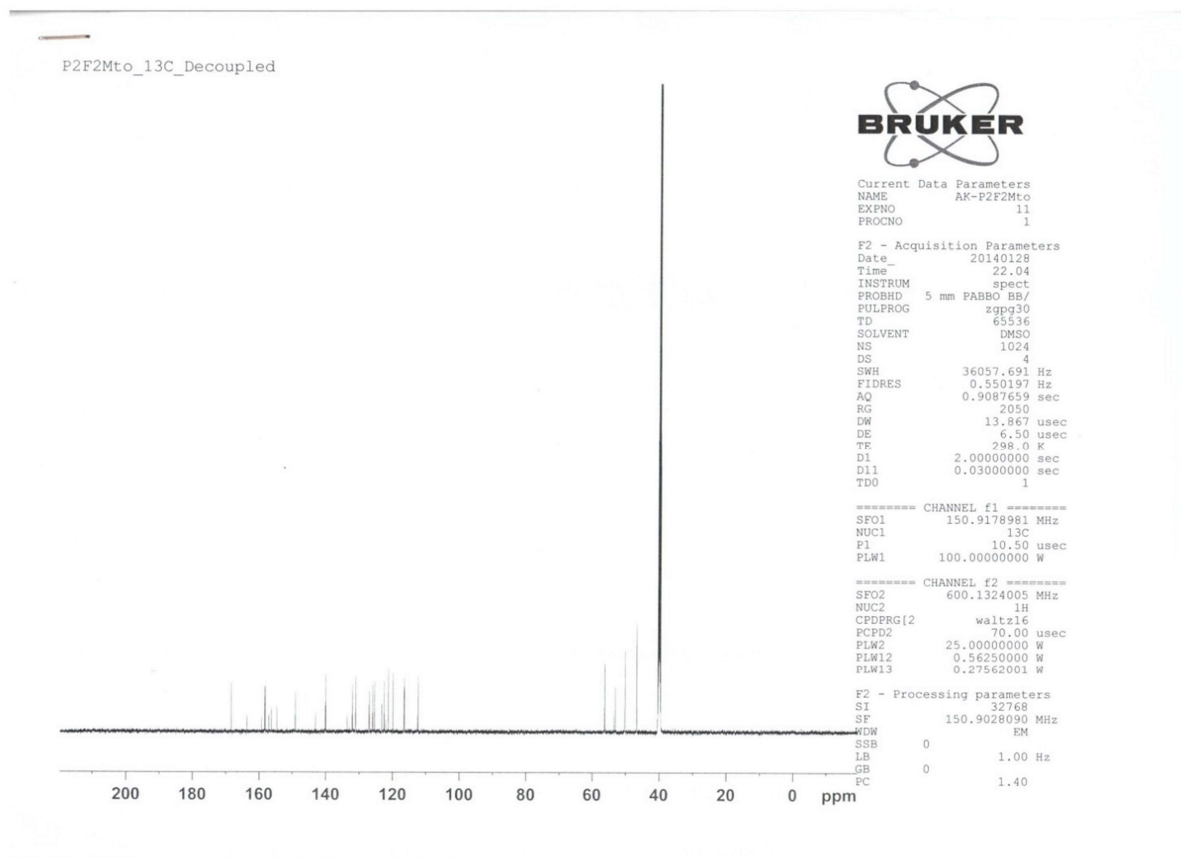

**Data 18. HRMS spectrum of compound T6**

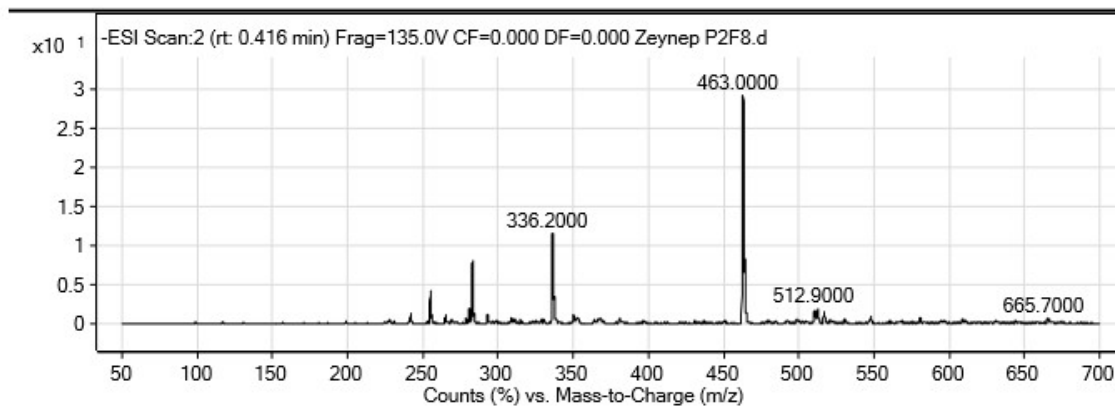

**Peak List**

| m/z   | Abund    |
|-------|----------|
| 255.1 | 4895.28  |
| 281   | 2339.54  |
| 283   | 9136.32  |
| 336.2 | 13092.22 |
| 337.1 | 3950.88  |
| 463   | 32864.1  |
| 464.1 | 9337.26  |

**Data 19. <sup>1</sup>H-NMR spectrum of compound T7**

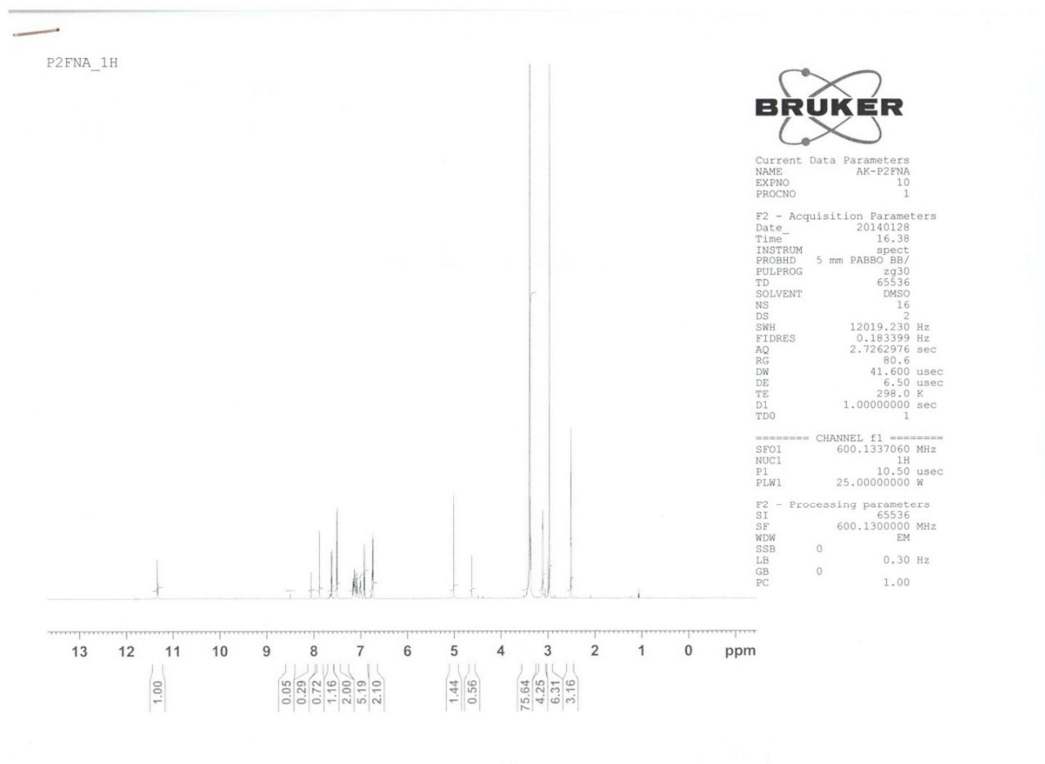

**Data 20.**  $^{13}\text{C}$ -NMR spectrum of compound T7

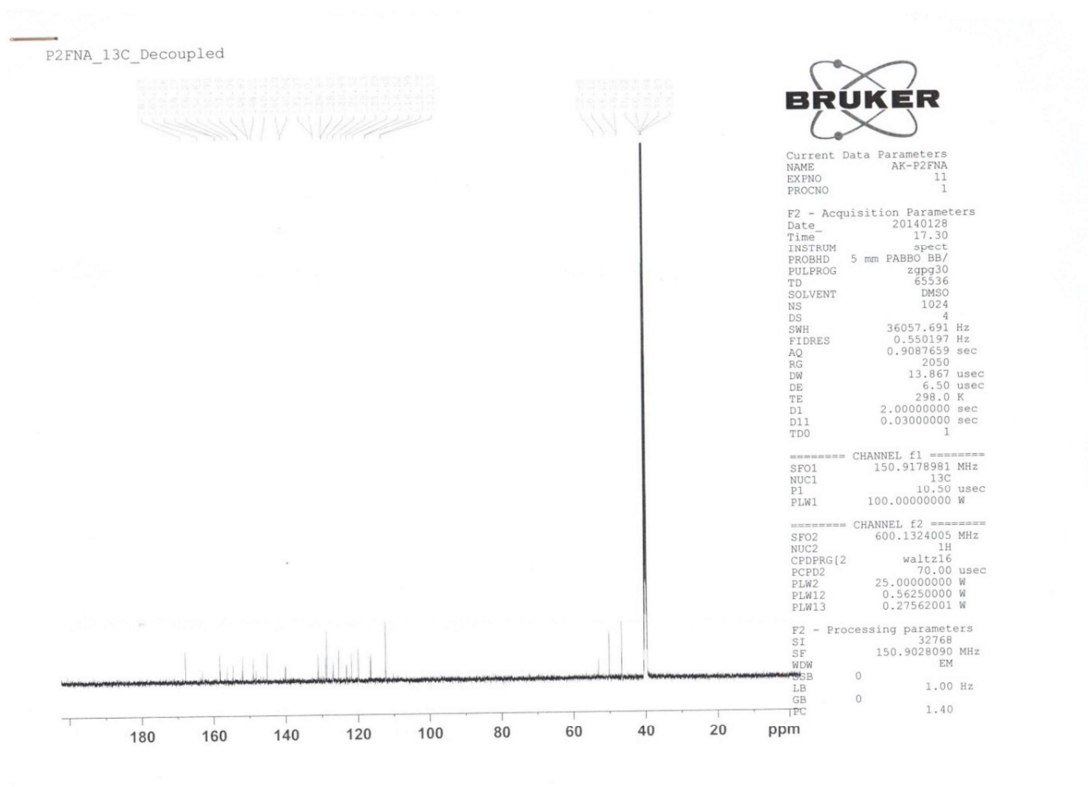

**Data 21.** HRMS spectrum of compound T7

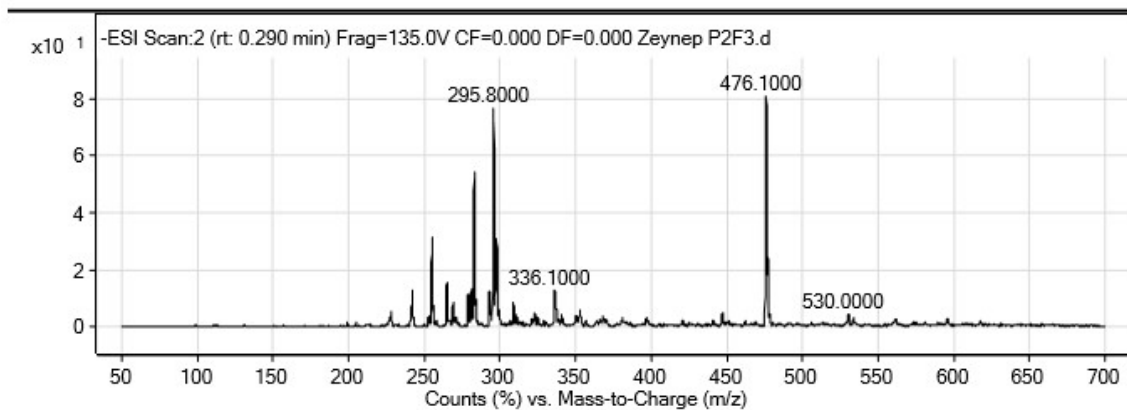

**Peak List**

| m/z   | z | Abund    |
|-------|---|----------|
| 242.1 |   | 4177.8   |
| 255.1 | 1 | 9973.54  |
| 264.9 | 1 | 4965.84  |
| 281.1 |   | 4239.44  |
| 283   | 1 | 17355.72 |
| 295.8 |   | 24492.76 |
| 297.7 | 2 | 9943.44  |
| 336.1 |   | 4078.94  |
| 476.1 | 1 | 25842.92 |
| 477.1 | 1 | 7893.2   |

<New compounds>

**Data 1.** <sup>1</sup>H-NMR spectrum of compound T8

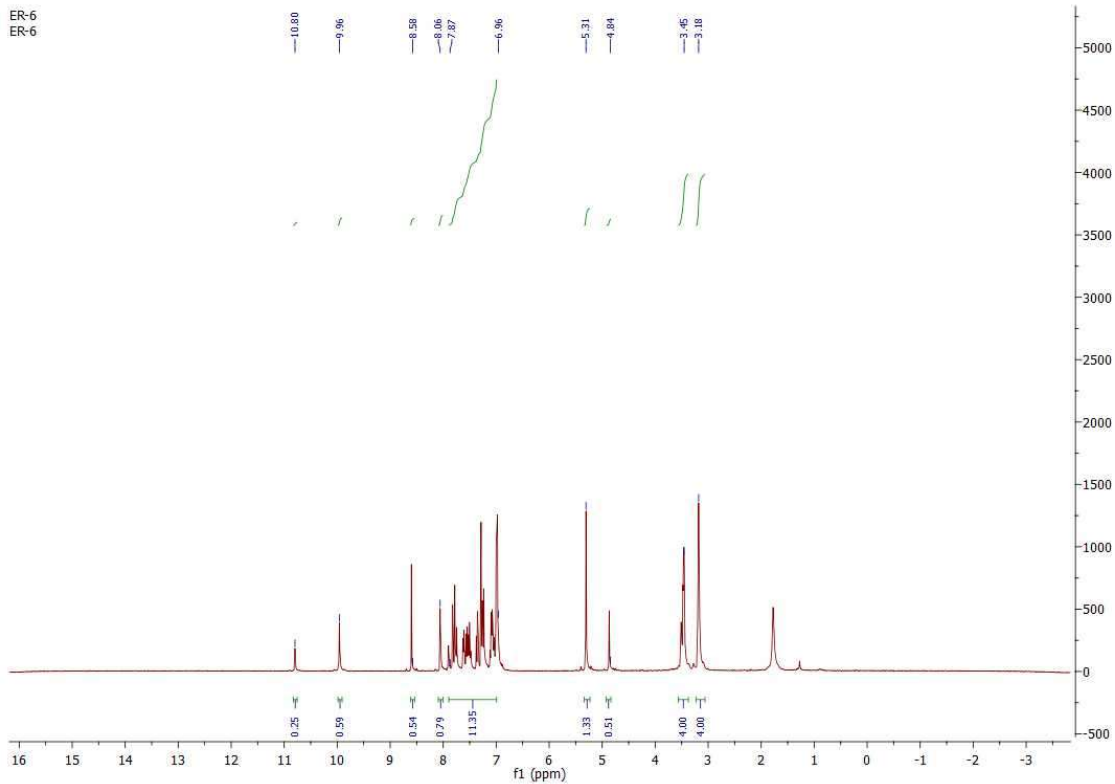

**Data 2. <sup>13</sup>C-NMR spectrum of compound T8**

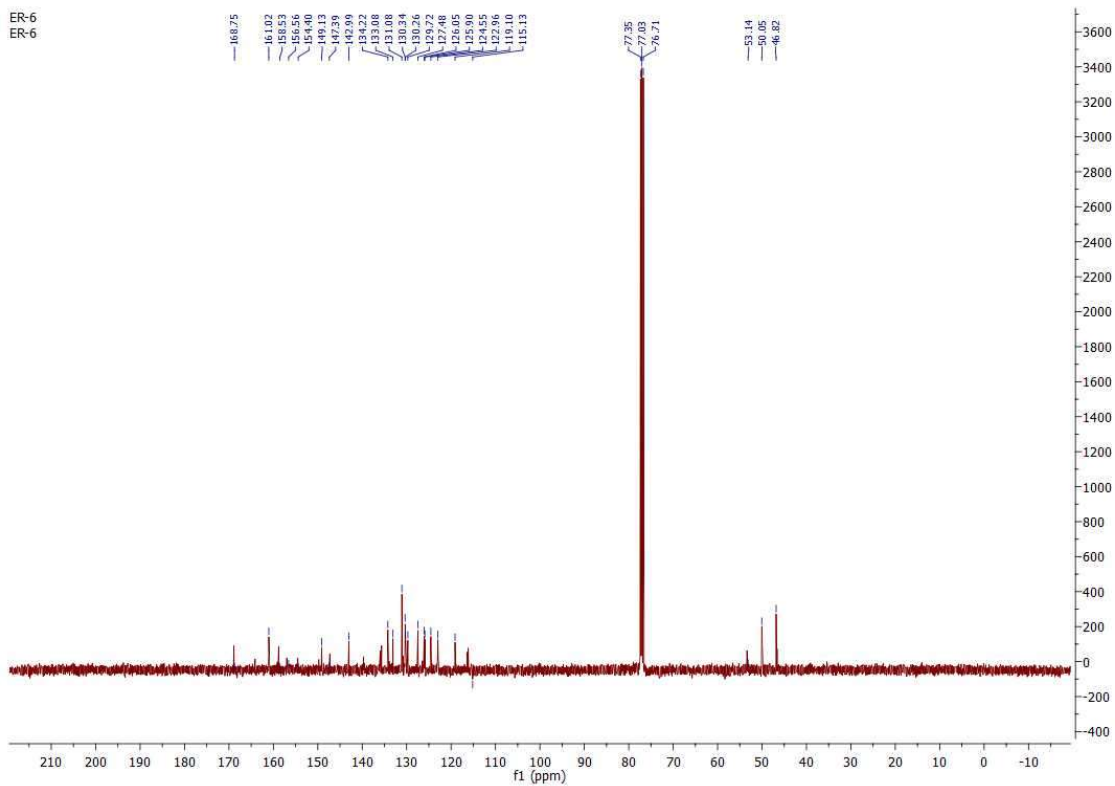

### Data 3. HRMS spectrum of compound T8

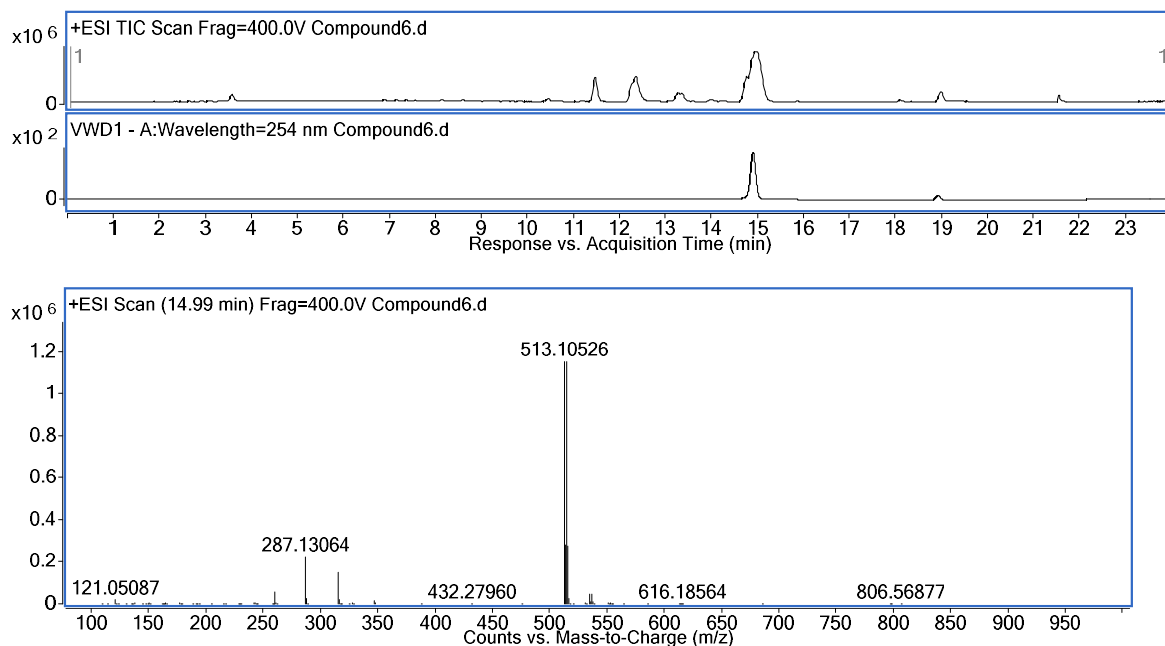

### Data 4. <sup>1</sup>H-NMR spectrum of compound T9

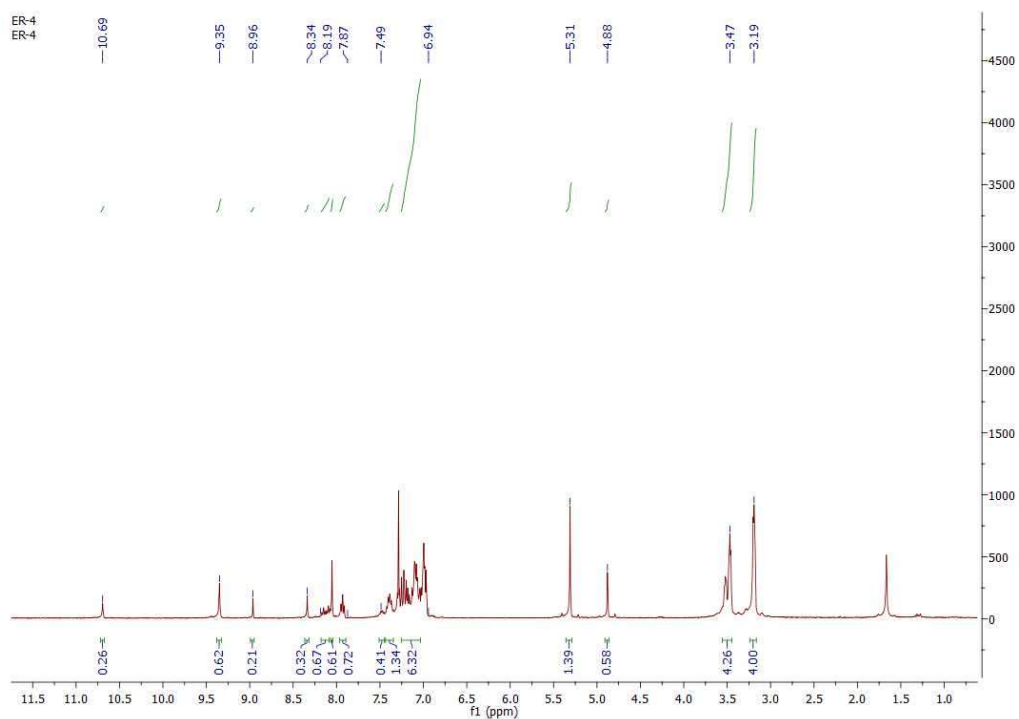

### Data 5. <sup>13</sup>C-NMR spectrum of compound T9

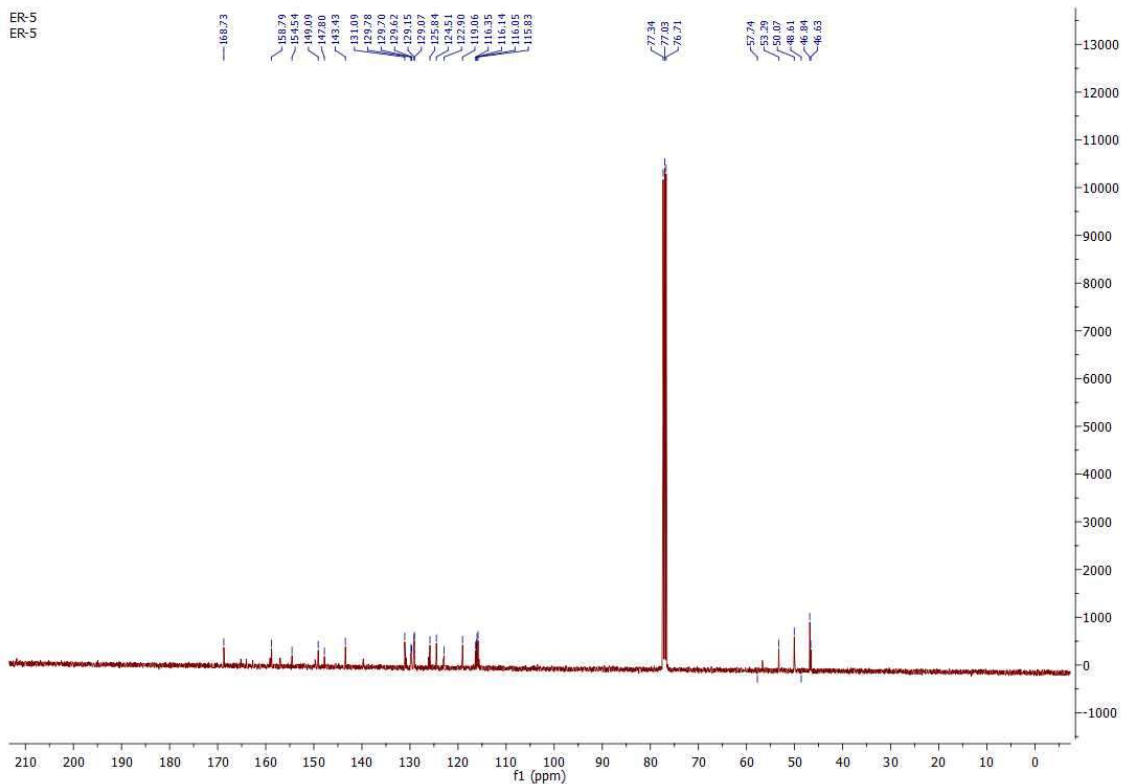

### Data 6. HRMS spectrum of compound T9

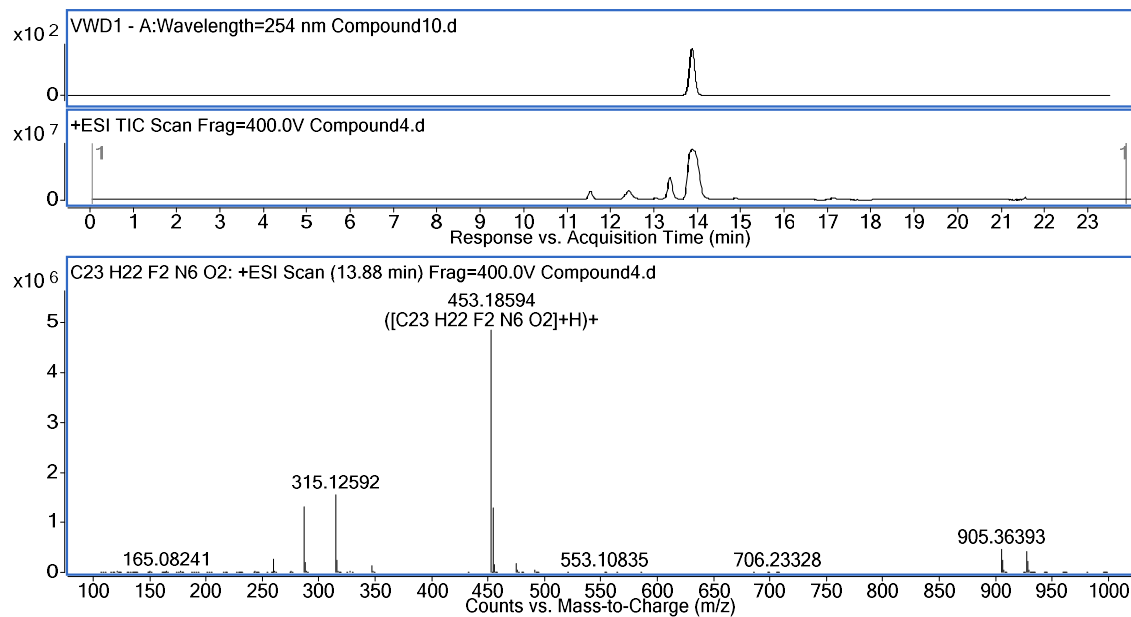

### Data 7. <sup>1</sup>H-NMR spectrum of compound T10

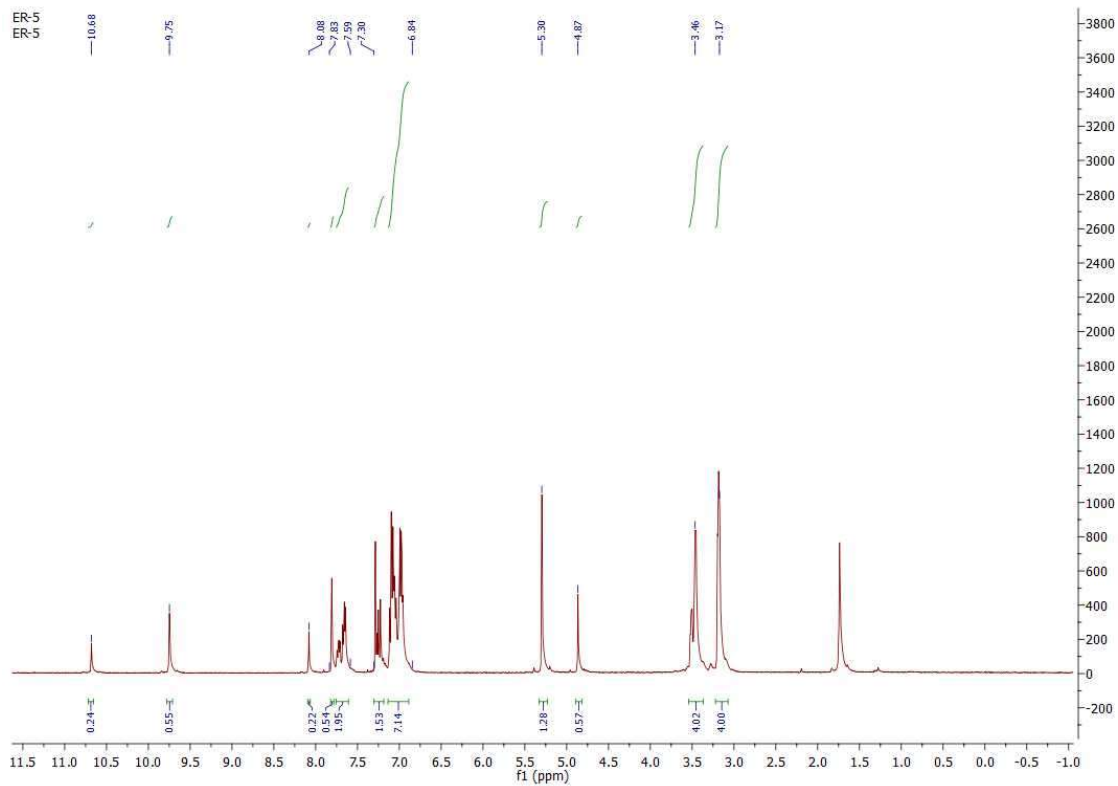

**Data 8. <sup>13</sup>C-NMR spectrum of compound T10**

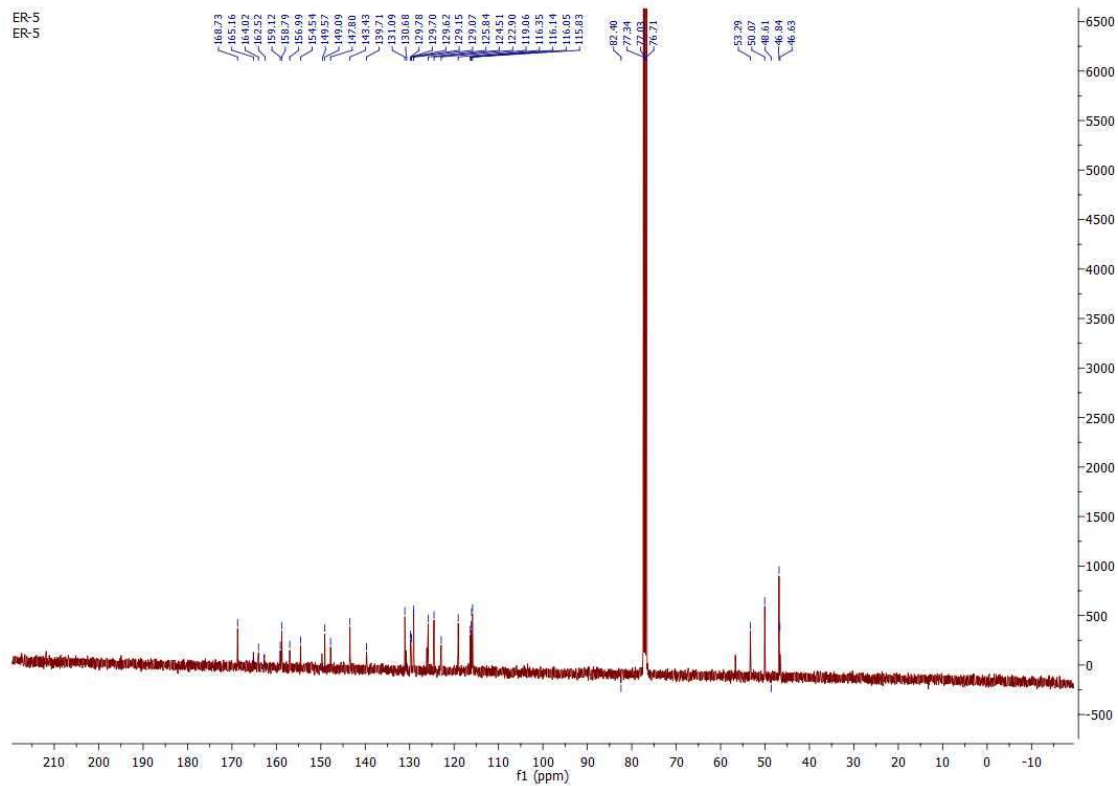



### Data 9. HRMS spectrum of compound T10

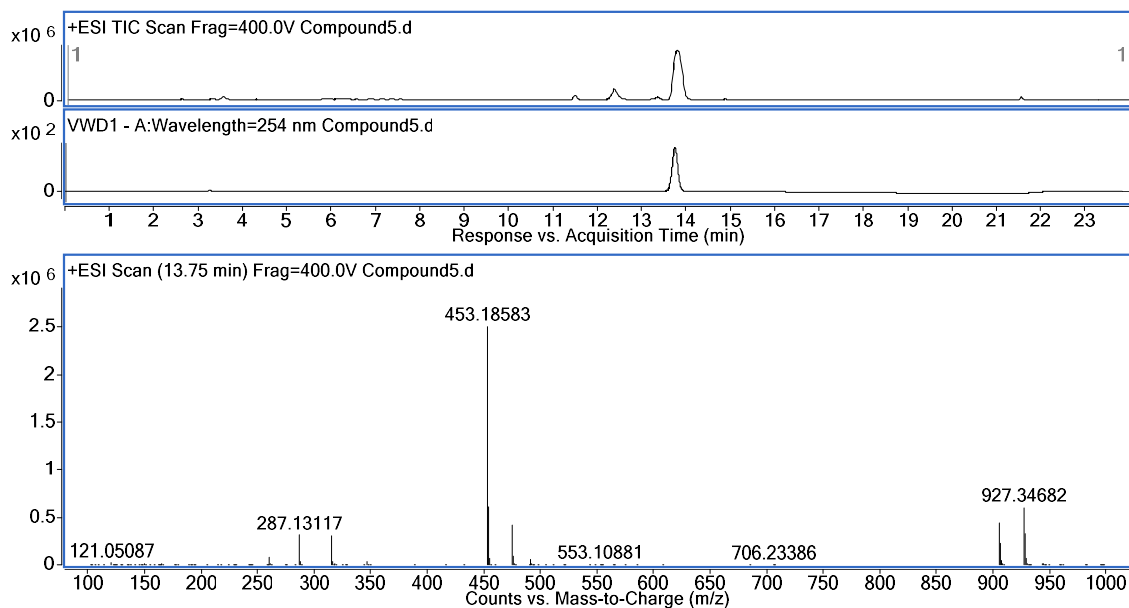

### Data 10. <sup>1</sup>H-NMR spectrum of compound T11

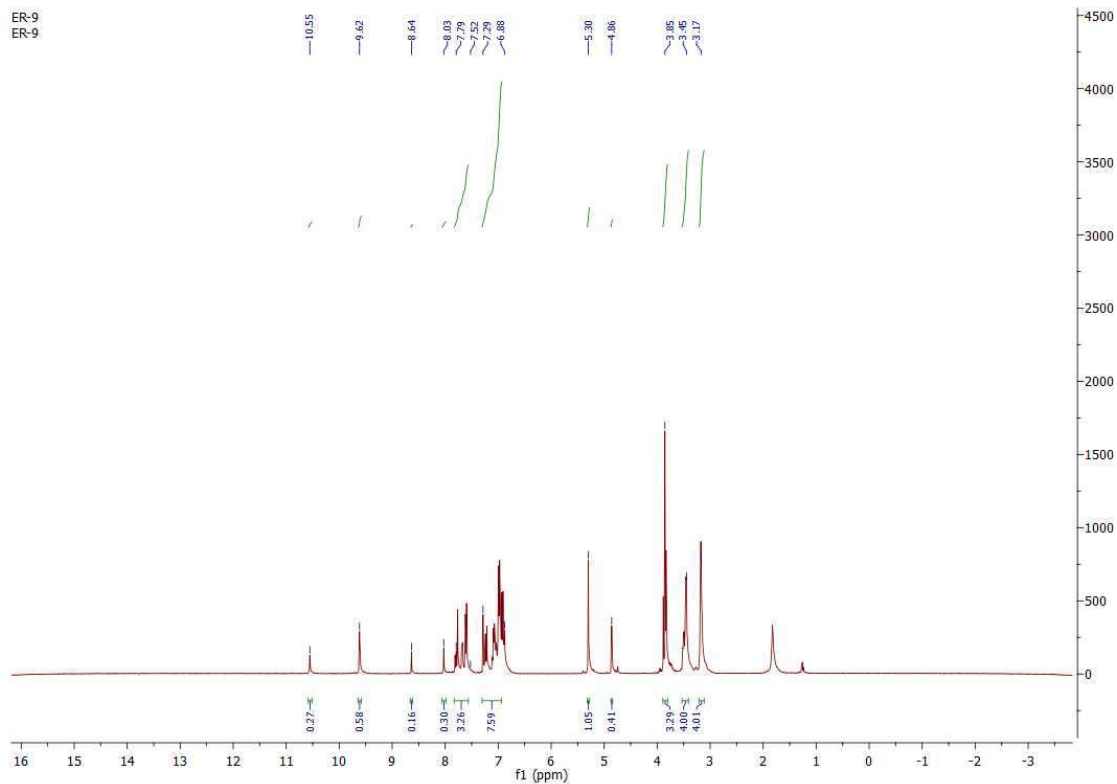

### Data 11. <sup>13</sup>C-NMR spectrum of compound T11

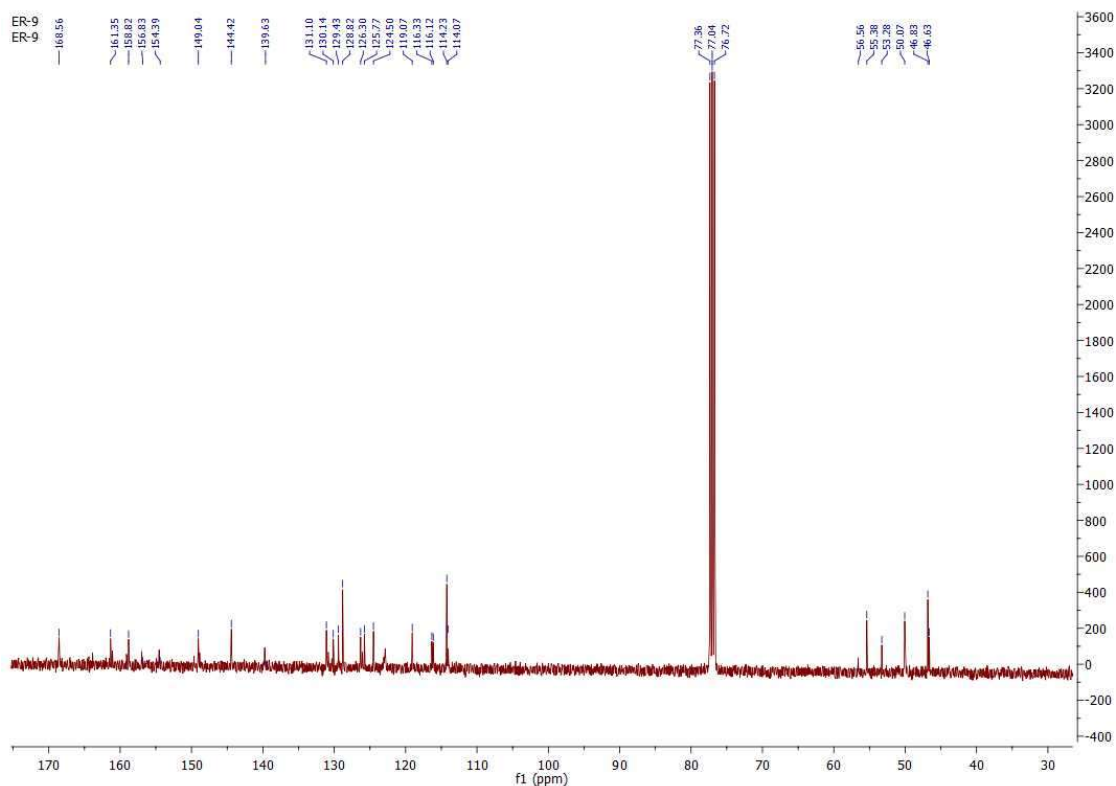

### Data 12. HRMS spectrum of compound T11

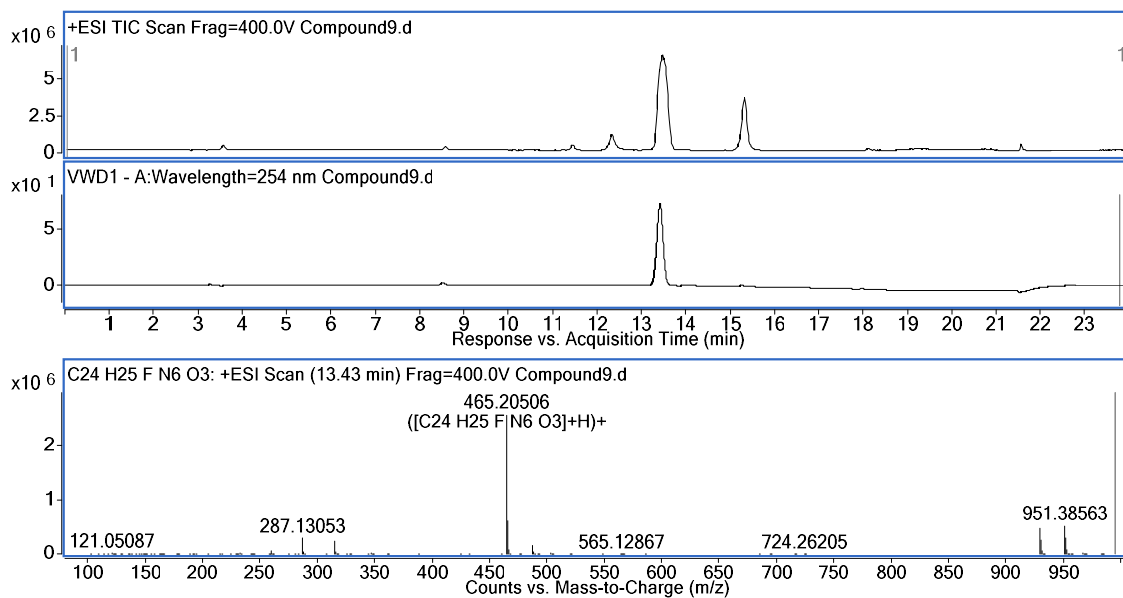

### Data 13. <sup>1</sup>H-NMR spectrum of compound T12

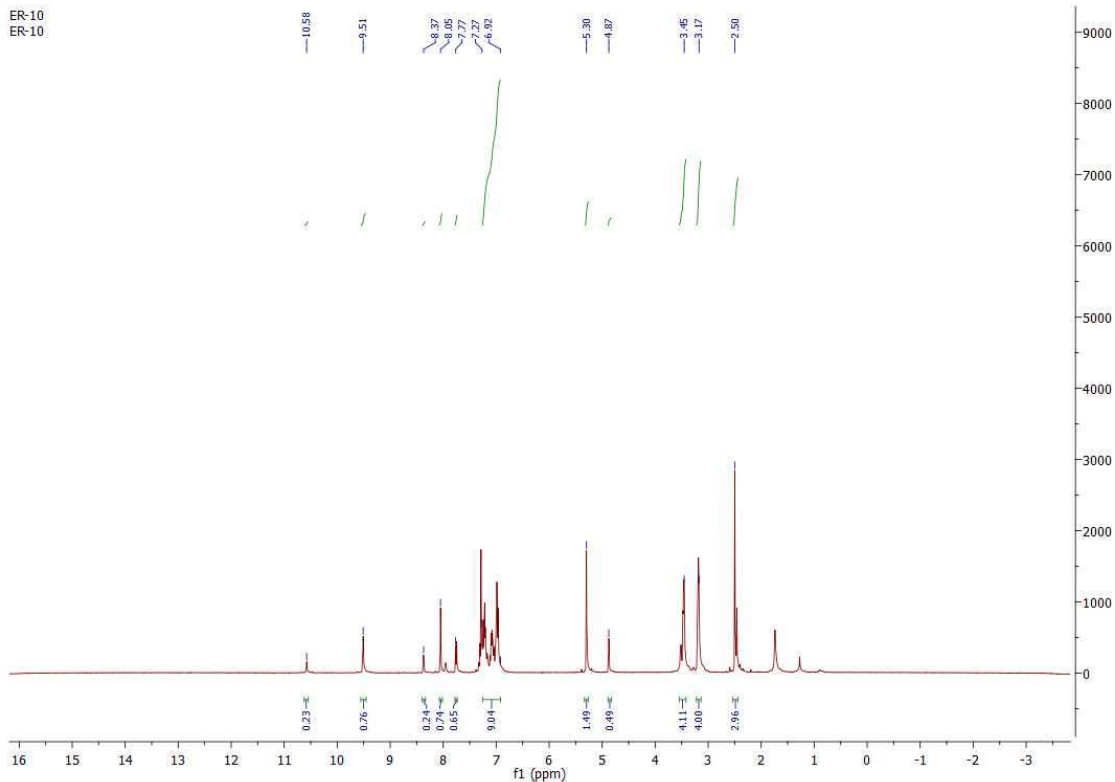

Data 14. <sup>13</sup>C-NMR spectrum of compound T12

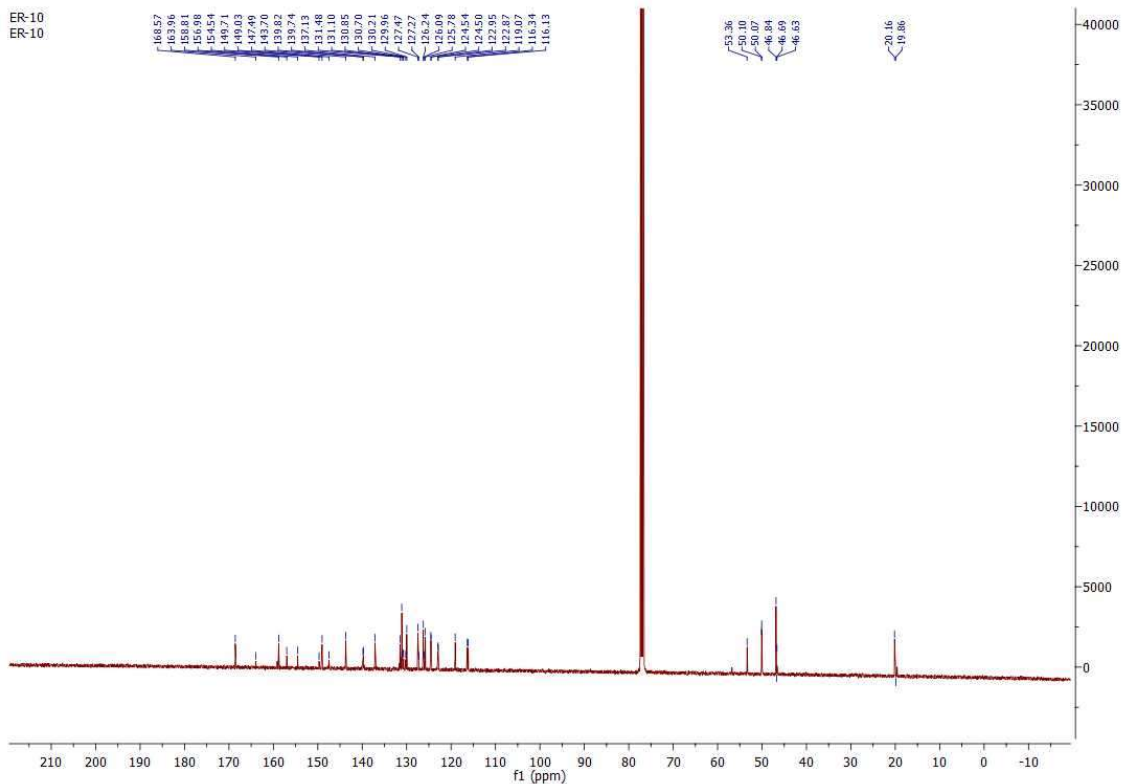

### Data 15. HRMS spectrum of compound T12

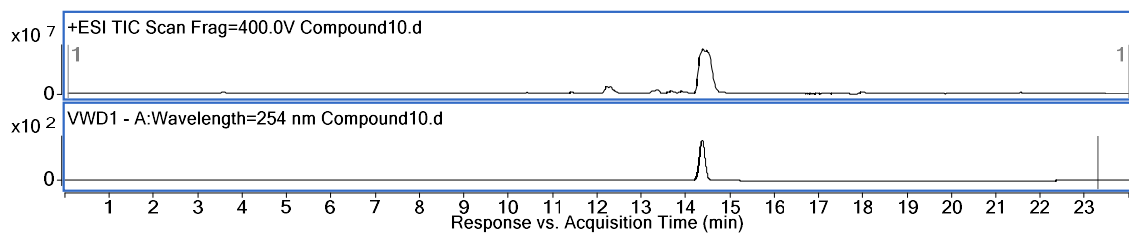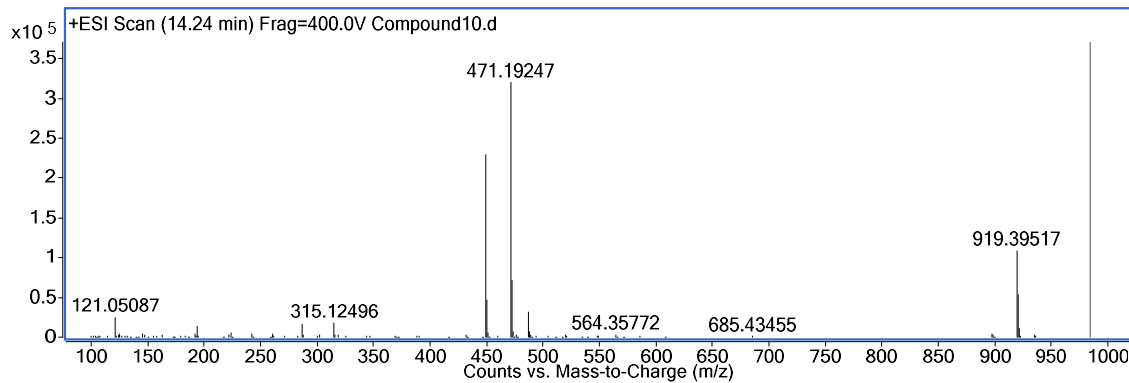

Supplement: molecules-25-05371-s001.pdf [file molecules-25-05371-s001.pdf]
